# Supplementary material for: Adsorption of flupyradifurone onto soils: kinetics, isotherms, and influencing factors
Source: Royal Society of Chemistry journal article supplement (doi:10.1039/d2em00372d), 2022-01-01
Supplement: d2em00372d1.pdf [file d2em00372d1.pdf]

## SUPPORTING MATERIALS

Adsorption of flupyradifurone onto five different soils: Kinetics, isotherms, and influences of soil properties

Nan Fang <sup>a,b</sup>, Yuqin Luo <sup>a</sup>, Jinhua Jiang <sup>a</sup>, Zhou Lu <sup>c</sup>, Zhiguang Hou <sup>b</sup>, Xueping Zhao <sup>a</sup>, Xiangyun Wang <sup>a</sup>, Tao Tang <sup>a</sup>, Changpeng Zhang <sup>a\*</sup> and  
Zhongbin Lu <sup>b\*</sup>

<sup>a</sup> State Key Laboratory for Managing Biotic and Chemical Threats to the Quality and Safety of Agro-products, Ministry of Agriculture and Rural Affairs Key Laboratory for Pesticide Residue Detection, Institute of Agro-Products Safety and Nutrition, Zhejiang Academy of Agricultural Sciences, Hangzhou 310021, China.

<sup>b</sup> College of Plant Protection, Jilin Agricultural University, Changchun, Jilin 130118, China.

<sup>c</sup> Laboratory of Quality & Safety Risk Assessment for Ginseng and Antler Products, Jilin Agricultural University, Changchun 130118, China.

\* Corresponding Author:

Professor Changpeng Zhang or Zhongbin Lu

E-mail: cpzhang1215@zaas.ac.cn (Changpeng Zhang) or luzhongbin100@jlau.edu.cn (Zhongbin Lu)

## **Chemicals and reagents**

FPO (purity>99.5%) was purchased from Chem Service (West Chester, PA, USA). Chromatographic grade acetonitrile (ACN) was purchased from Thermo Fisher Scientific (Waltham, MA, USA). Ultrapure water was prepared using a Milli-Q system (Bedford, MA, USA). The primary-secondary amine (PSA) sorbent was purchased from Agilent (Santa Clara, CA, USA). All other chemicals, including formic acid, sodium chloride (NaCl), anhydrous magnesium sulfate (MgSO<sub>4</sub>), and calcium chloride (CaCl<sub>2</sub>) were of analytical-reagent and were obtained from Shanghai Aladdin Biochemical Technology (Shanghai, China).

## **Quantitation control (QC)**

The QC of FPO in the adsorption samples was carried out simultaneously with the analysis of the adsorption samples. The external standard method was used for the quantification of FPO. The results are shown in Table S3. FPO recoveries in supernatant samples ranged from 87.3% to 94.4% (intraday) with the relative standard deviations (RSDs) ranging from 3.6% to 6.7%, and 91.5% to 94.9% (interday) with RSDs ranging from 1.9% to 8.7%. It indicated that the analysis method fulfilled the QA/QC required by the GB/T 31270.4-2014 guideline.

**Table S1** Selected physicochemical properties of soils.

| Soil | Location                            | pH   | TOC <sup>a</sup><br>(%) | CEC <sup>b</sup><br>(cmol kg <sup>-1</sup> ) | Soil texture (%) |                |               |
|------|-------------------------------------|------|-------------------------|----------------------------------------------|------------------|----------------|---------------|
|      |                                     |      |                         |                                              | Clay (<2 μm)     | Silt (2-20 μm) | Sand (>20 μm) |
| S1   | Changchun (125°41'34 E, 43°82'33 N) | 6.20 | 0.49                    | 20.38                                        | 21.18            | 44.86          | 33.96         |
| S2   | Harbin (126°28'36 E, 45°51'46 N)    | 5.76 | 1.62                    | 16.52                                        | 44.67            | 49.37          | 5.96          |
| S3   | Hangzhou (120°12'19 E, 30°19'11 N)  | 7.36 | 2.65                    | 24.98                                        | 68.45            | 22.39          | 9.16          |
| S4   | Langfang (116°36'52 E, 39°31'8 N)   | 4.14 | 0.62                    | 22.94                                        | 36.12            | 38.67          | 25.21         |
| S5   | Jinan (117°21'65 E, 36°82'17 N)     | 8.31 | 1.45                    | 48.34                                        | 30.49            | 40.84          | 28.67         |

<sup>a</sup> TOC: Total organic carbon.

<sup>b</sup> CEC: Cation exchange capacity.

**Table S2** HPLC-MS/MS conditions for the determination of Flupyradifurone.

| HPLC condition                 |                                                                                                                                                      |                                |                                        |                           |
|--------------------------------|------------------------------------------------------------------------------------------------------------------------------------------------------|--------------------------------|----------------------------------------|---------------------------|
| Instrumental                   | Agilent 1260 HPLC, Santa Clara, CA, USA.                                                                                                             |                                |                                        |                           |
| Column                         | Agilent C <sub>18</sub> column, ZORBAX RRHD Eclipse Plus, 3.0 mm × 100 mm, 1.8 μm.                                                                   |                                |                                        |                           |
| Column oven                    | 30 °C                                                                                                                                                |                                |                                        |                           |
| Injection volume               | 5 μL                                                                                                                                                 |                                |                                        |                           |
| Flow rate                      | 0.3 mL/min                                                                                                                                           |                                |                                        |                           |
| Mobile phase                   | A: 0.1% formic acid aqueous solution.<br>B: acetonitrile.                                                                                            |                                |                                        |                           |
| Gradient elution               | 0–4 min, linear gradient 80%–60% solvent A; 4–6 min, linear gradient 60%–20% solvent A, and held for 1 min; 7–10 min, linear gradient 80% solvent A. |                                |                                        |                           |
| MS/MS condition                |                                                                                                                                                      |                                |                                        |                           |
|                                | Positive mode                                                                                                                                        | Negative mode                  |                                        |                           |
| Instrumental                   | Agilent 6470 triple quadrupole mass spectrometer, Santa Clara, CA, USA.                                                                              |                                |                                        |                           |
| Ion source                     | Electrospray ionization                                                                                                                              |                                |                                        |                           |
| Nebulizer pressure (psi)       | 30                                                                                                                                                   | 30                             |                                        |                           |
| Capillary voltage (kV)         | 4.0                                                                                                                                                  | 4.0                            |                                        |                           |
| Nozzle voltage (kV)            | 0.5                                                                                                                                                  | 0.5                            |                                        |                           |
| Desolvation flow rates (L/min) | 7                                                                                                                                                    | 7                              |                                        |                           |
| Sheath gas flow rates (L/min)  | 8                                                                                                                                                    | 8                              |                                        |                           |
| Desolvation temperature (°C)   | 330                                                                                                                                                  | 330                            |                                        |                           |
| Source temperature (°C)        | 300                                                                                                                                                  | 300                            |                                        |                           |
| MRM <sup>a</sup> condition     | Retention time (min)                                                                                                                                 | Precursor ion (fragmentor, eV) | Qualitative ion (CE <sup>b</sup> , eV) | Quantitative ion (CE, eV) |
| Flupyradifurone                | 5.84                                                                                                                                                 | 289.0 (140)                    | 245.1 (15)                             | 126.1 (25)                |

<sup>a</sup> MRM: multiple reaction monitoring.<sup>b</sup> CE: collision energy.

**Table S3** Mean recoveries and RSD for Flupyradifurone from supernatant samples at three spiked levels.

| Spiked level<br>(mg L <sup>-1</sup> ) | Intraday (n=5)<br>%Recovery (RSD <sub>r</sub> <sup>a</sup> ) | Inter-day (n=15)<br>%Recovery (RSD <sub>R</sub> <sup>b</sup> ) |
|---------------------------------------|--------------------------------------------------------------|----------------------------------------------------------------|
| 0.01                                  | 94.1 (6.7)                                                   | 94.9 (6.1)                                                     |
| 1                                     | 90.5 (4.6)                                                   | 91.5 (8.7)                                                     |
| 30                                    | 87.3 (3.6)                                                   | 92.2 (1.9)                                                     |

<sup>a</sup> the intraday relative standard deviation for repeatability (n=5)

<sup>b</sup> the inter-day relative standard deviation for repeatability (n=15)

**Table S4** The K<sub>oc</sub> of flupyradifurone in different soil samples under different temperature condition.

| Soils | TOC (%) | Temperature (K) | K <sub>d</sub> | K <sub>oc</sub> |
|-------|---------|-----------------|----------------|-----------------|
| S1    | 0.49    | 298             | 0.8433         | 1.7211          |
|       |         | 308             | 0.5742         | 1.1718          |
|       |         | 318             | 0.5160         | 1.0532          |
| S2    | 1.62    | 298             | 1.8725         | 1.1558          |
|       |         | 308             | 3.5800         | 2.2099          |
|       |         | 318             | 2.9704         | 1.8336          |
| S3    | 2.65    | 298             | 3.4252         | 1.2925          |
|       |         | 308             | 6.4892         | 2.4488          |
|       |         | 318             | 4.9004         | 1.8492          |
| S4    | 0.62    | 298             | 1.7539         | 2.8289          |
|       |         | 308             | 3.5048         | 5.6529          |
|       |         | 318             | 2.7967         | 4.5108          |
| S5    | 1.45    | 298             | 2.1444         | 1.4789          |
|       |         | 308             | 3.5029         | 2.4158          |
|       |         | 318             | 3.0295         | 2.0893          |
